# Detection and spread of high pathogenicity avian influenza virus H5N1 in the Antarctic Region

Running title: HPAIV in the Antarctic

Ashley Bennison<sup>1</sup>, Alexander M. P. Byrne<sup>2</sup>, Scott M. Reid<sup>2</sup>, Joshua G. Lynton-Jenkins<sup>2,3</sup>, Benjamin Mollett<sup>2</sup>, Dilhani De Sliva<sup>2</sup>, Jacob Peers-Dent<sup>2</sup>, Kim Finlayson<sup>4</sup>, Rosamund Hall<sup>1</sup>, Freya Blockley<sup>1</sup>, Marcia Blyth<sup>1</sup>, Marco Falchieri<sup>2</sup>, Zoe Fowler<sup>5</sup>, Elaine M. Fitzcharles<sup>1</sup>, Ian H. Brown<sup>2,3</sup>, Joe James<sup>2,3</sup> and Ashley C. Banyard<sup>2,3,@</sup>

<sup>1</sup> British Antarctic Survey, Madingley Road, Cambridge CB3 0ET, UK

<sup>2</sup> Department of Virology, Animal and Plant Health Agency (APHA-Weybridge), Woodham Lane, Addlestone, Surrey KT15 3NB, UK

<sup>3</sup> WOA/FAO International Reference Laboratory for Avian Influenza, Animal and Plant Health Agency (APHA-Weybridge), Woodham Lane, Addlestone, Surrey KT15 3NB, UK

<sup>4</sup> KEMH Pathology and Food, Water & Environmental Laboratory, St Mary's Walk, Stanley, Falkland Islands, FIQQ 1ZZ

<sup>5</sup> Department of Agriculture, Bypass Road, Stanley, Falkland Islands, FIQQ 1ZZ

@ Corresponding author Email: [ashley.banyard@apha.gov.uk](mailto:ashley.banyard@apha.gov.uk)

23 **Abstract**

24 The Antarctic is the only major geographical region in which high pathogenicity avian influenza virus  
25 (HPAIV) has never previously been detected. The current panzootic of H5N1 HPAIV has decimated  
26 wild bird populations across Europe, North America and South America. Here we report on the  
27 emergence of clade 2.3.4.4b H5N1 HPAIV in the Antarctic and sub-Antarctic regions of South  
28 Georgia and the Falkland Islands respectively. We initially detected H5N1 HPAIV in samples  
29 collected from brown skuas at Bird Island, South Georgia on 8<sup>th</sup> October 2023. Since this detection,  
30 increased mortalities were observed in brown skuas, kelp gulls, elephant seals and fur seal at multiple  
31 sites across South Georgia. We confirmed H5N1 HPAIV in multiple brown skuas and kelp gulls  
32 across four different sampling locations in South Georgia. Simultaneously, we also confirmed H5N1  
33 HPAIV in a southern fulmar in the Falkland Islands. Genetic assessment of the virus indicates spread  
34 from South America, likely through movement of migratory birds. Here we describe the emergence,  
35 species impact and genetic composition of the virus and propose both introductory routes and  
36 potential long-term impact on avian and mammalian species across the Antarctic region.

37

## 38 **Introduction**

39 Following the emergence and global expansion of A/goose/Guangdong/1/96 (GsGd)-lineage H5 high  
40 pathogenicity avian influenza viruses (HPAIV) there have been repeat epizootics in wild birds and  
41 poultry populations globally. In the autumn of 2021, the situation escalated considerably with the  
42 detection of clade 2.3.4.4b HPAIV subtype H5N1 in Europe. Subsequently, two unprecedented  
43 epizootic waves in 2021/22 and 2022/23 with this lineage were associated with mass mortality events  
44 in wild birds together with thousands of incursions into poultry<sup>1,2,3,4,5</sup>. High levels of viral adaptation  
45 to wild bird species<sup>6</sup>, and increased fitness advantage through continued genetic reassortment<sup>7</sup> likely  
46 underpin the broad impact infection has had across many avian species<sup>2</sup>. This wide host range has  
47 facilitated the transmission of the lineage across a large geographic area, including from Europe to  
48 North America<sup>8,9</sup>, where it has since rapidly expanded its range southward into South America via  
49 migratory avian species. Incursion into South American countries, starting in November of 2022,  
50 represented the first recorded instances of GsGd-lineage H5 HPAIV in the region<sup>10,11,12</sup>. Mass  
51 mortality events in the region have been particularly severe and reported across several different bird  
52 species in addition to marine mammals<sup>2,10,13</sup>, highlighting the extensive ecological impact of HPAIV  
53 and the ongoing threat it presents to naïve hosts.

54         The Antarctic region includes the ice shelves, waters, and all the island territories in the  
55 Southern Ocean situated inside of the Antarctic Convergence, a marine belt encircling Antarctica  
56 where Antarctic waters meet those of the warmer sub-Antarctic. Several islands are located inside the  
57 Antarctic region, including South Georgia, while the Falkland Islands among others are located  
58 outside the Antarctic Convergence in the sub-Antarctic zone. There have been no previous reports of  
59 HPAIV inside the Antarctic region<sup>14</sup>. Antarctica and the sub-Antarctic islands possess unique  
60 ecosystems which support the population strongholds of several avian and marine mammal species.  
61 The relative isolation of these islands from human populations has provided species across the  
62 Antarctic with only limited protection from anthropogenic environmental change<sup>15</sup>. Indeed, wildlife  
63 populations in the Antarctic face a broad range of challenges from introduced species<sup>16</sup>, to longline  
64 fisheries<sup>17,18</sup>, and rapid climate change<sup>19,20,21</sup>. Several resident bird species including wandering

65 albatross (*Diomedea exulans*), macaroni penguins (*Eudyptes chrysolophus*), grey-headed albatross  
66 (*Thalassarche chrysostoma*), and white-chinned petrel (*Procellaria aequinoctialis*), are listed as either  
67 vulnerable or endangered<sup>22</sup>. Iconic long-lived species with late maturity, such as albatross, exhibit low  
68 resilience to rapid increases in population mortality<sup>23</sup>. High mortality disease outbreaks therefore  
69 represent a substantial threat to already vulnerable seabird populations<sup>24, 25</sup>.

70 While geographically isolated, several Antarctic seabird species routinely range between the  
71 South Atlantic and Southern Ocean, visiting the South American coast to either forage or  
72 overwinter<sup>26</sup>. Brown skuas (*Stercorarius antarcticus*), kelp gulls (*Larus dominicanus*), southern giant  
73 petrel (*Macronectes giganteus*), and snowy sheathbills (*Chionis albus*) have previously been  
74 identified as potential vectors of infectious pathogens into this vulnerable ecosystem due to their  
75 migratory traits, scavenging behaviour, and previously identified roles as carriers of low pathogenicity  
76 avian influenza viruses (LPAIV)<sup>27, 28, 29, 30, 31, 32, 33, 34</sup>. Evidence of low pathogenicity avian influenza  
77 virus (LPAIV) in the Antarctic region was first detected from serological studies in the 1980s<sup>35, 36, 37</sup>.  
78 A range of subtypes have since been reported (H1<sup>37</sup>, H3<sup>28</sup>, H4<sup>32</sup>, H5<sup>38</sup>, H6<sup>29</sup>, H7<sup>36</sup>, H9<sup>28</sup>, and H11<sup>30</sup>)  
79 including genetic analysis of H4N7<sup>32</sup>, H5N5<sup>30, 38</sup>, H6N8<sup>29</sup> and H11N2<sup>30, 39, 40</sup> influenza viruses. In  
80 contrast to the more prevalent H11N2 viruses, H4-H6 subtypes were found to share high sequence  
81 similarity with viruses from continental America, indicating more recent introduction events<sup>29, 30, 32</sup>.  
82 Evidence of likely LPAIV transmission to the continent from the Americas demonstrates the high-risk  
83 of clade 2.3.4.4b H5 HPAIV introduction to the Antarctic, encouraging researchers in 2022 to employ  
84 additional biosecurity measures while maintaining surveillance activities<sup>27, 41</sup>. During the austral  
85 summer of 2022/23, sampling and surveillance was conducted at several sites in the Antarctic region,  
86 and as of March 2023, HPAIV had not been detected<sup>14</sup>.

87 Here we describe the observation of morbidity and mortality events across different species  
88 as well as the positive detection of H5N1 HPAIV in a variety of species in South Georgia, inside the  
89 Antarctic region and the sub-Antarctic Falkland Islands. We detail the suspicion, emergence,  
90 diagnostic evaluation and clinical presentations of HPAIV in the region. Genetic analysis is used to  
91 characterise potential introduction routes and the consequences of HPAIV circulation in this region  
92 are considered.

## 93 **Results**

### 94 **Case description**

95 On September 17<sup>th</sup>, researchers of the British Antarctic Survey (BAS) on Bird Island, South Georgia,  
96 (Figure 1A) discovered a single southern giant petrel showing behaviours indicative of loss of  
97 coordination, neurological twitching, and lethargy. This individual was observed being predated and  
98 scavenged upon by brown skuas and other southern giant petrels. On 8<sup>th</sup> October, brown skuas were  
99 observed in the same locality showing lethargy, neck spasms, twitching, and an inability to fly, and by  
100 10<sup>th</sup> October, these individuals had died (Figure 1B). In the following days bird mortality was seen on  
101 Bird Island, South Georgia, with the highest number of mortalities occurring at the roosting site of  
102 non-breeding birds. Swab samples were collected from the three brown skua (*Stercorarius*  
103 *antarcticus*) on 8<sup>th</sup> October 2023 which were later found dead on Bird Island, South Georgia (Figure  
104 1B). Mortalities increased rapidly in brown skuas, with ten birds recorded dead by 15<sup>th</sup> October 2023  
105 and a further twenty birds by 20<sup>th</sup> October. Further escalation in mortality occurred by 17<sup>th</sup> November  
106 2023, when 57 skuas were observed to have died at Bird Island, and close monitoring continues.

107 On 30<sup>th</sup> October, swab samples were collected from six found dead kelp gull and four found  
108 dead brown skua from Hound Bay, South Georgia in addition to four found dead brown skua from St  
109 Andrews, South Georgia (Figure 1B). On 31<sup>st</sup> of October, swab samples were collected from six kelp  
110 gulls, and six brown skuas which were found dead in Moltke Harbour, South Georgia. On 3<sup>rd</sup>  
111 November, samples were collected from six found dead kelp gulls and two brown skuas on Harpon,  
112 South Georgia (Figure 1B). Alongside avian species, clinical disease consistent with mammalian  
113 infection with HPAIV was observed in colonies of elephant seals. Clinical presentation included  
114 difficulty breathing, with coughing and short sharp breath intake. Individuals also showed  
115 accumulation of viscous fluid around the nasal passage. Swab samples were collected from seven  
116 recently deceased southern elephant seals (*Mirounga leonine*) on 31<sup>st</sup> October from Moltke Harbour,  
117 South Georgia (Figure 1B).

118 Concurrent to the events emerging on South Georgia, on 30<sup>th</sup> October, a southern fulmar  
119 (*Fulmarus glacialisoides*) was reported dead in Stanley, Falkland Islands and swab samples were

120 collected (Figure 1A). Over the next few days mortality was seen in other avian species in Stanley,  
121 and samples were collected from a Grey-backed storm petrel (*Garrodia nereis*) and Falkland steamer  
122 duck (*Tachyeres brachypterus*) on 6<sup>th</sup> November.

123

#### 124 **Virology and detection**

125 Provision for diagnostic investigation of avian influenza is limited in the region. Local molecular  
126 testing at the KEMH Pathology and Food, Water & Environmental Laboratory on the Falkland Islands  
127 indicated the presence of avian influenza A H5N1 viral RNA (vRNA) in a Southern Fulmar. This  
128 detection, alongside the increase clinical disease and mortalities observed on South Georgia triggered  
129 shipment of samples to the International Reference Laboratory for avian influenza, swine influenza  
130 and Newcastle disease virus at the Animal and Plant Health Agency (APHA), Weybridge, UK for  
131 confirmatory and further diagnostic evaluation. All six oropharyngeal (OP) and cloacal (C) swabs  
132 from the three brown skuas from South Georgia collected on 8<sup>th</sup> October were positive by each of the  
133 generic AIV, HPAIV H5 detection and N1-specific rRT-PCR assays (Supplementary Table 1),  
134 signifying the presence of HPAIV H5N1 in all three birds. However, infectious virus could not be  
135 isolated from any of these samples. Eighteen additional OP and C swab samples from brown skuas  
136 (n=12) and kelp gulls (n=6) sampled from four sites across South Georgia between 30<sup>th</sup> October and  
137 3<sup>rd</sup> of November also all tested positive for the presence of H5N1 HPAIV vRNA (Supplementary  
138 Table 1). Infectious virus was successfully isolated from four birds, including from one kelp gull and  
139 two brown skuas from Hound Bay and one kelp gull at Harpon Bay. Nasal and rectal swabs from  
140 three elephant seals collected on Moltke Harbour on 3<sup>rd</sup> November were negative in each assay, and  
141 no infectious virus could be isolated from these animals. Within the same period samples collected  
142 from a southern fulmar on 30<sup>th</sup> October in the Falkland Islands tested positive for HPAIV H5N1  
143 vRNA, while a Grey-backed storm petrel and Falkland steamer duck tested negative in each assay.

144

#### 145 **Genomic and phylogenetic analysis**

146 Three full genome sequences were generated from the initial OP swab samples of the three brown  
147 skuas from Bird Island collected on 8<sup>th</sup> October 2023. Comparison of the three sequences revealed

148 that they shared 99.86-100% nucleotide identity across all eight influenza viral gene segments. In  
149 addition, a single sequence was also generated from the Southern Fulmar collected from the Falkland  
150 Islands on 30<sup>th</sup> October 2023. Comparison of the sequences obtained from South Georgia and the  
151 Falkland Islands found that they shared greater than 98.98% nucleotide identity across all gene  
152 segments. The Bird Island and Falkland Islands sequences were then combined with representative  
153 global H5N1 clade 2.3.4.4b full-genome sequences to assess genetic ancestry (Supplementary Figure  
154 1). The sequences from Bird Island clustered with those of viruses collected from South America,  
155 between December 2022 and April 2023, particularly Uruguay, Peru and Chile, across all gene  
156 segments. The sequences from Bird Island and the Falkland Islands were genotyped according to the  
157 United States H5N1 schema, given the spread of these viruses from North to South America in early  
158 2022<sup>10</sup>, and found to be part of the B3.2 genotype<sup>42</sup>. The B3.2 genotype arose in early 2022 in North  
159 Dakota as a reassortant formed by the original H5N1 that was transmitted from Europe to North  
160 America in late 2021<sup>8</sup> and then obtained gene segments (PB2, PB1, NP and NS) from local North  
161 American AIVs<sup>42</sup>. This genotype was reported to have been introduced into South America four times  
162 between October 2022 and March 2023<sup>10</sup>, and analysis of all publicly available full-genome  
163 sequences from South America found that 94% (131 of 140) of H5N1 belonged to this genotype.

164 To further investigate the introduction of H5N1 HPAIV into South Georgia and the Falkland  
165 Islands, representative H5N1 clade 2.3.4.4b HA sequences from North and South America were used  
166 to perform time-resolved phylogenetic analysis (Figure 2). This analysis demonstrated distinct,  
167 separate introductions of H5N1 into South Georgia and the Falkland Islands, with both sets of  
168 sequences sharing a common ancestor with sequences from South America dating between late  
169 November 2022 (Falkland Islands) and late January 2023 (South Georgia). However, both sets of  
170 sequences produced long branch lengths compared to South American sequences. To further  
171 investigate the source of these viruses, discrete trait analysis based upon the country of origin was  
172 performed (Supplementary Figure 2), which suggested that the source of HPAIV for both South  
173 Georgia and the Falkland Islands was Chile.

174

## 175 **Discussion**

176 Since the emergence and global expansion of Gs/Gd-lineage H5Nx HPAIV in 1996, Antarctica and  
177 Oceania are the only two continents in which it has not been detected. Moreover, until now,  
178 Antarctica remains the only major geographical region in which HPAIV had never been detected.

179 The island of South Georgia lies in the Southern Ocean inside the Antarctic convergence, a  
180 marine belt encircling Antarctica which defines the Antarctic Region. The island is an area of high  
181 biodiversity and high conservation priority with multiple species being considered as vulnerable to the  
182 incursion of infectious diseases<sup>43, 44, 45</sup>. The Falkland Islands constitute a remote cluster of islands in  
183 the South Atlantic Ocean situated approximately 1500km to the west of South Georgia. The Falkland  
184 Islands are situated outside of the Antarctic convergence, in the sub-Antarctic region. Both the  
185 Falkland Islands archipelago and South Georgia represent key areas that are host to significant avian  
186 biodiversity and the presence of HPAIV on these islands represents a significant risk to the  
187 populations of susceptible bird species. South Georgia is home to approximately 29 species which  
188 breed on the islands and is recognised as an 'Important Bird Area' by Birdlife International<sup>46</sup>.  
189 Therefore, any colony or population that comes under threat from an HPAIV outbreak on South  
190 Georgia may have direct impact upon the wider population of seabirds. Despite seabird colonies  
191 showing space partitioning between colonies<sup>47</sup>, there is often a high degree of connectivity between  
192 colonies. Often this is due to the movement of nonbreeders or juvenile birds<sup>48</sup>. It is therefore, not  
193 unreasonable to suspect that birds on South Georgia may show high connectivity, which may aid the  
194 spread of disease, as has been documented previously<sup>33</sup>, but also may be evidenced by the rapid  
195 collection of samples from different areas within South Georgia. Indeed, in the northern hemisphere it  
196 has been found that northern gannets (*Morus bassanus*) increased their connectivity due to high levels  
197 of colony prospecting from surviving birds<sup>49</sup>.

198 This connectivity and the interlinkages between avian and mammalian species in a 'single  
199 ecosystem' having been identified across the Antarctic region means that the virus may be readily  
200 spread across the region. Circumpolar and trans-Pacific migrants such as Gray-headed albatross  
201 (*Thalassarche chrysostoma*)<sup>50</sup>, White-chinned petrel (*Procellaria aequincotialis*)<sup>51</sup>, Northern and



202 southern giant petrels may facilitate this spread. Indeed, phylogeographic analysis has suggested a  
203 dynamic geneflow between southern Atlantic populations and Macquarie island<sup>52</sup>, and as such the  
204 threat of transmission to New Zealand and Australasia must be considered.

205 From a mammalian infection standpoint there have been several reports globally of wild  
206 aquatic mammals, including seals, being infected with H5Nx HPAIV since 2020, where infection has  
207 been attributed to the predation of sick or dead infected birds<sup>10, 53, 54</sup>. Information to date suggests that  
208 HPAIV infection in seals often leads to a neurological presentation with infrequent detection of viral  
209 material being detected through standard swab sampling activities<sup>53</sup>. This may explain the lack of  
210 influenza A vRNA detection in elephant seal swab samples taken from this study, despite the  
211 consistency of clinical presentation seen in elephant seals with that reported elsewhere. Certainly, the  
212 timing of mortality and clinical signs exhibited by elephant seals are consistent with HPAIV infection.  
213 Unfortunately, invasive sampling was prohibited in this study due to a lack of personal and respiratory  
214 protective equipment to safely undertake such sampling and invasive sampling of avian and  
215 mammalian species remains challenging to undertake in areas where appropriate facilities are lacking.

216 A further conundrum that will likely significantly impact upon the course of infection and  
217 onward spread of viral infection across the region is the limited options for carcass disposal and  
218 environmental clean-up. The Antarctic region is one of the most remote environments on earth and is  
219 the location of enormous breeding colonies of various avian species that may be susceptible, and  
220 succumb, to infection with HPAIV. Where mortality events occur, the opportunity for scavenging  
221 animals exists to predate upon carcasses and become infected. Carcass removal is not an option.  
222 Further the potential for virus survival in this cold environment is increased and it may be that  
223 infectious virus remains for longer periods in carcasses preserved by the local climate. Local ecology  
224 of species could also influence the scale of impact throughout Antarctica. Although all species remain  
225 vulnerable to large scale infection events, it is possible that the density of animals may preclude some  
226 species from rapid spread<sup>55</sup>. For example, wandering albatross nest at low density (approximately  
227 0.0022 nests per m<sup>2</sup>)<sup>56</sup>, which could limit spread between breeding individuals. However, non-  
228 breeding birds congregate in groups to display and dance<sup>57</sup> which may provide opportunities for  
229 disease spread. Similar ecological considerations must be made when considering burrow nesting

230 species (such as white-chinned petrel, diving petrel, and prion species), which nest in separated  
231 burrow systems and may limit spread. Penguins are also susceptible to HPAIV, and mortality has  
232 been observed following infection<sup>58</sup>. Penguin species nest in high densities (dependent upon species  
233 ranging between 0.25 - 1.7 nests per m<sup>2</sup>)<sup>59,60</sup>, and if HPAIV does enter penguin colonies, it could  
234 show rapid infection and spread. If the virus does start to cause mass mortality events across penguin  
235 colonies, it could signal one of the largest ecological disasters of modern times. Activities within the  
236 region are ongoing to track mortality events and autonomous authorities are on high alert to signal the  
237 potential for incursions across the broader area.

238         Genomic analysis of the sequences obtained from South Georgia and the Falkland Islands  
239 suggested separate, distinct introductions of the B3.2 HPAIV genotype into the two locations. The  
240 B3.2 genotype emerged in early 2022 in the midwestern United States of America as a reassortant  
241 formed following coinfection with the original H5N1 that was transmitted from Europe to North  
242 America in late 2021<sup>8</sup> with a North American virus from which the novel genotype emerged,  
243 containing the PB2, PB1, NP and NS gene segments of the North American AIVs<sup>42</sup>. This genotype  
244 has been demonstrated to have been introduced into South America four times between October 2022  
245 and March 2023<sup>10</sup>. Analysis of all available full-genome sequences from South America demonstrated  
246 that 94% (131 of 140) of H5N1 HPAIV sequences corresponded to this genotype. Given the close  
247 geographical proximity of South Georgia and the Falkland Islands to South America, and that wild  
248 bird species are known to migrate between the mainland and these islands, it is not surprising that the  
249 B3.2 detected as the cause of the disease events. The phylogenetic analyses undertaken demonstrated  
250 that the viruses detected in South Georgia and the Falkland Islands shared common ancestors with  
251 those detected in mainland South America from late 2022 to early 2023. However, the long branch  
252 lengths observed across all gene segments suggest unsampled evolutionary ancestry. There are also  
253 only a limited number of sequences deposited in public databases from H5N1 HPAIV detections in  
254 South America during summer 2023. Taken together, this highlights the importance of real-time  
255 global data sharing as a key tool in understanding the emergence and spread of these viruses. The  
256 current lack of publicly available data precludes a conclusive assessment of potential incursion routes

257 substantially more difficult. Multiple disciplines globally continue to monitor the situation in  
258 Antarctica to see whether fears of ecological disaster in the region will be realised.

259

## 260 **Methods**

### 261 **Virological detection**

262 On the Falkland Islands, initial diagnostic assessment of samples was undertaken at the KEMH  
263 Pathology and Food, Water & Environmental Laboratory utilising the QIAamp Viral RNA Mini Kit  
264 (Qiagen) and the Oasig OneStep RT-qPCR kit for H5N1 (Genesig). A preliminary diagnosis was made  
265 of avian influenza H5N1 infection. Following reports of increasing mortalities and the observation of  
266 disease consistent with HPAIV infection in avian and mammalian species in South Georgia,  
267 oropharyngeal (OP) and cloacal (C) swabs collected from birds were submitted to the Animal and Plant  
268 Health Agency (APHA)-Weybridge for laboratory virological investigation. Total nucleic acid was  
269 extracted from all samples<sup>61</sup> for testing by a suite of three AIV real-time reverse transcription  
270 polymerase chain reaction (rRT-PCR) assays consisting of the Matrix (M)-gene assay for generic  
271 influenza A virus detection<sup>62</sup>; an assay for specific detection of HPAIV H5 clade 2.3.4.4b<sup>61</sup> and an N1-  
272 specific rRT-PCR to confirm the neuraminidase type<sup>63</sup>. A positive result was denoted in each case by a  
273 Cq value  $\leq 36.0$ . The samples were also screened for avian paramyxovirus type 1 (APMV-1) by an rRT-  
274 PCR assay targeting the large polymerase (L) gene<sup>64</sup> where a positive result was denoted by a Cq value  
275  $\leq 37.0$ . All amplifications were carried out in an AriaMx qPCR System (Agilent, United Kingdom). The  
276 OP swabs and the C swabs were separately pooled for attempted virus isolation in 9- to 11-day-old  
277 specific pathogen-free (SPF) embryonated fowls' eggs (EFEs) according to the internationally  
278 recognised methods<sup>65</sup>.

279

### 280 **Whole-Genome Sequencing and Phylogenetic Analysis**

281 For whole-genome sequence analysis, the extracted vRNA was converted to double-stranded cDNA  
282 and amplified using a one-step RT-PCR using SuperScript III One-Step RT-PCR kit (Thermo Fisher  
283 Scientific). The primers used were as follows: Optil-F1 5'-TTACGCGCCAGCAAAAAGCAG-3',

284 Optil-F2 5'-GTTACGCGCCAGCGAAAGCAGG-3' and Optil-R1 5'-  
285 GTTACGCGCCAGTAGAAACAAG-3' that have been previously described<sup>66, 67</sup>. PCR products were  
286 purified with Agencourt AMPure XP beads (Beckman Coulter) prior to sequencing library  
287 preparation using the Native Barcoding Kit (Oxford Nanopore Technologies) and sequenced using a  
288 GridION Mk1 (Oxford Nanopore Technologies) according to manufacturer's instructions. Assembly  
289 of the influenza A viral genomes was performed using a custom in-house pipeline as described  
290 previously<sup>7</sup> but adapted for nanopore sequence reads. All influenza sequences generated and used in  
291 this study are available through the GISAID EpiFlu Database (<https://www.gisaid.org>). All H5N1  
292 HPAIV clade 2.3.4.4b sequences available in the EpiFlu database between 1<sup>st</sup> September 2020 and  
293 27<sup>th</sup> October 2-23 were downloaded to create a sequence dataset. As North America and Europe were  
294 over-represented in this dataset, these were sub-sampled to maintain representative sequences using  
295 PARNAS<sup>68</sup>. The remaining dataset was separated by segment and aligned using Mafft v7.520<sup>69</sup>, and  
296 manual trimmed to the open-reading frame using Aliviewversion 1.26<sup>70</sup>. The trimmed alignments  
297 were then used to infer maximum-likelihood phylogenetic tree using IQ-Tree version 2.2.3<sup>71</sup> along  
298 with ModelFinder<sup>7</sup> and 1,000 ultrafast bootstraps<sup>72</sup>. For the time-resolved and migration analysis, all  
299 HA sequences available from South America, and representative from North America were combined  
300 with the sequences from Bird Island and the Falkland Islands and used to infer a maximum-likelihood  
301 phylogenetic tree as described above. The resulting tree was then used for ancestral sequence  
302 reconstruction and inference of molecular-clock phylogenies using TreeTime<sup>73</sup>. Phylogenetic  
303 reconstruction with discrete trait analysis of the country of origin using the migration model, was also  
304 performed in TreeTime using the default settings. Phylogenetic trees were visualised as described  
305 previously<sup>72</sup> or using FigTree v1.4.4. Nucleotide identity between sequences was determined as  
306 described previously<sup>72</sup>. Sequences were genotyped according to the USDA schema, using the  
307 GenoFLU tool (<https://github.com/USDA-VS/GenoFLU>)<sup>42</sup>.

308

## 309 **Acknowledgements**

310 We would like to thank Thomas Lewis and Vivian Coward from APHA for their help processing  
311 these samples and Carrie Gunn from BAS and Vicki Foster from the Government of South Georgia  
312 and the South Sandwich Islands. We are grateful for the support and collaboration provided by the  
313 Government of South Georgia and the South Sandwich Islands, who have helped to coordinate the  
314 response and guidance in response to HPAI at South Georgia. The authors would also like to  
315 acknowledge the originating and submitting laboratories of the sequences from GISAID's EpiFlu  
316 Database upon which this research is based, and analyses described in the text. All submitters of the  
317 data may be contacted directly via the GISAID website (<https://www.gisaid.org>). This analysis  
318 described in this work was conducted using the Scientific Computing Environment at the Animal and  
319 Plant Health Agency.

## 320 **Author contributions**

321 Conceptualisation: ACB, JJ, AB, EMF, ZF; formal analysis: AB, JJ, SMR, KF, ACB, AMPB;  
322 investigation: SMR, JLJ, DdS, FB, MB, RH, AMPB, JPD, BM; resources: ACB, JJ, IHB, ZF, EMF;  
323 writing—original draft, ACB, JJ, AMPB, SR; writing—review and editing: ACB, JJ, APMB, AB, ZF,  
324 EMF, SMR, IHB. All authors have read and agreed to the final version of the manuscript.

## 325 **Competing interests**

326 The authors declare no competing interests.

## 327 **Funding statement**

328 This research received no external funding. The testing and generation of the viral sequences was  
329 funded by the Department for Environment, Food and Rural Affairs (Defra, UK) and the Devolved  
330 Administrations of Scotland and Wales, through the following programmes: SV3400, SV3032,  
331 SV3006 and SE2213. This work was also supported by the Biotechnology and Biological Sciences  
332 Research Council (BBSRC) and Department for Environment, Food and Rural Affairs (Defra, UK)  
333 research initiative 'FluTrailMap' [grant number BB/Y007271/1]. This work was also partially

334 supported by KAPPA-FLU HORIZON-CL6-2022-FARM2FORK-02-03 (grant agreement No.  
335 101084171) and Innovate UK (grant number 10085195).

336

## 337 **Additional information**

338 Correspondence and requests for materials should be addressed to [Ashley.Banyard@APHA.gov.uk](mailto:Ashley.Banyard@APHA.gov.uk)

339

## 340 **Figure Legends**

341 **Figure 1. Geographical distribution of H5N1 HPAIV detections from South Georgia. (A)** Map  
342 showing the locations of South America (blue), the Falkland Islands (red), South Georgia (green) and  
343 the Antarctic peninsula (yellow). **(B)** Map showing the location, species, and date of sampling of  
344 avian and mammalian species in South Georgia.

345

346 **Figure 2. H5N1 HPAIV transmission from the South American continent to Falkland Islands**  
347 **and South Georgia. (A)** Representative haemagglutinin (HA) sequences H5N1 HPAIVs from North  
348 and South America were combined with those obtained from South Georgia and the Falkland Islands  
349 and used to generate a time-resolved maximum-likelihood phylogenetic tree and coloured according  
350 to origin location.

351

352 **Supplementary Figure 1.** Representative global H5N1 HPAIV sequences collected since 1st  
353 September 2020 were combined with the sequences generated from samples collected from South  
354 Georgia and the Falkland Islands and used to infer maximum likelihood phylogenetic trees. Tips are  
355 coloured according to region of origin, and the sequences from South Georgia and the Falkland Islands  
356 are indicated.

357

358 **Supplementary Figure 2.** Discrete trait analysis of representative H5N1 clade 2.3.4.4b from North and  
359 South America. Branches are coloured according to the inferred source country.

360

## 361 References

- 362 1. Adlhoch C, *et al.* Avian influenza overview February - May 2021. *EFSA journal European*  
363 *Food Safety Authority* **19**, e06951 (2021).
- 364 2. Adlhoch C, *et al.* Avian influenza overview March - April 2023. *EFSA journal European*  
365 *Food Safety Authority* **21**, e08039 (2023).
- 367 3. Lane JV, *et al.* High pathogenicity avian influenza (H5N1) in Northern Gannets (*Morus*  
368 *bassanus*): Global spread, clinical signs and demographic consequences. *Ibis* **n/a**.
- 370 4. Furness RW, *et al.* Environmental Samples Test Negative for Avian Influenza Virus H5N1  
371 Four Months after Mass Mortality at A Seabird Colony. *Pathogens* **12**, 584 (2023).
- 373 5. Falchieri M, *et al.* Shift in HPAI infection dynamics causes significant losses in seabird  
374 populations across Great Britain. *Veterinary Record* **191**, 294-296 (2022).
- 376 6. James J, *et al.* Clade 2.3.4.4b H5N1 high pathogenicity avian influenza virus (HPAIV) from  
377 the 2021/22 epizootic is highly duck adapted and poorly adapted to chickens. *The Journal of*  
378 *general virology* **104**, (2023).
- 380 7. Byrne AMP, *et al.* Investigating the Genetic Diversity of H5 Avian Influenza Viruses in the  
381 United Kingdom from 2020-2022. *Microbiology spectrum* **11**, e0477622 (2023).
- 383 8. Caliendo V, *et al.* Transatlantic spread of highly pathogenic avian influenza H5N1 by wild  
384 birds from Europe to North America in 2021. *Scientific Reports* **12**, 11729 (2022).
- 386 9. Alkie TN, *et al.* Recurring Trans-Atlantic Incursion of Clade 2.3.4.4b H5N1 Viruses by Long  
387 Distance Migratory Birds from Northern Europe to Canada in 2022/2023. *Viruses* **15**, (2023).
- 389 10. Leguia M, *et al.* Highly pathogenic avian influenza A (H5N1) in marine mammals and  
390 seabirds in Peru. *Nature Communications* **14**, 5489 (2023).
- 392 11. Marandino A, *et al.* Spreading of the High-Pathogenicity Avian Influenza (H5N1) Virus of  
393 Clade 2.3. 4.4 b into Uruguay. *Viruses* **15**, 1906 (2023).
- 395 12. Jimenez-Bluhm P, *et al.* Detection and phylogenetic analysis of highly pathogenic A/H5N1  
396 avian influenza clade 2.3. 4.4 b virus in Chile, 2022. *Emerging Microbes & Infections*,  
397 2220569 (2023).
- 399 13. Gamarra-Toledo V, *et al.* Avian flu threatens Neotropical birds. *Science* **379**, 246-246 (2023).

401

- 402 14. Lisovski S, *et al.* No evidence for highly pathogenic avian influenza virus H5N1 (clade  
403 2.3.4.4b) in the Antarctic region during the austral summer 2022/23. *bioRxiv*,  
404 2023.2010.2024.563692 (2023).
- 405  
406 15. Chown SL, Clarke A, Fraser CI, Cary SC, Moon KL, McGeoch MA. The changing form of  
407 Antarctic biodiversity. *Nature* **522**, 431-438 (2015).
- 408  
409 16. Frenot Y, *et al.* Biological invasions in the Antarctic: extent, impacts and implications.  
410 *Biological reviews* **80**, 45-72 (2005).
- 411  
412 17. Martin A, Poncet S, Barbraud C, Foster E, Fretwell P, Rothery P. The white-chinned petrel  
413 (*Procellaria aequinoctialis*) on South Georgia: population size, distribution and global  
414 significance. *Polar Biology* **32**, 655-661 (2009).
- 415  
416 18. Pardo D, *et al.* Additive effects of climate and fisheries drive ongoing declines in multiple  
417 albatross species. *Proceedings of the National Academy of Sciences* **114**, E10829-E10837  
418 (2017).
- 419  
420 19. Descamps S, *et al.* Extreme snowstorms lead to large-scale seabird breeding failures in  
421 Antarctica. *Current Biology* **33**, R176-R177 (2023).
- 422  
423 20. Steig EJ, Schneider DP, Rutherford SD, Mann ME, Comiso JC, Shindell DT. Warming of the  
424 Antarctic ice-sheet surface since the 1957 International Geophysical Year. *Nature* **457**, 459-  
425 462 (2009).
- 426  
427 21. González-Herrero S, Barriopedro D, Trigo RM, López-Bustins JA, Oliva M. Climate  
428 warming amplified the 2020 record-breaking heatwave in the Antarctic Peninsula.  
429 *Communications Earth & Environment* **3**, 122 (2022).
- 430  
431 22. IUCN. The IUCN red list of threatened species. Version 2022-2. *IUCN Red List of*  
432 *Threatened Species*, (2023).
- 433  
434 23. Pianka ER. On r-and K-selection. *The American Naturalist* **104**, 592-597 (1970).
- 435  
436 24. Camphuysen C, Gear S, Furness R. Avian influenza leads to mass mortality of adult Great  
437 Skuas in Foula in summer 2022. *Scott Birds* **42**, 312-323 (2022).
- 438  
439 25. Banyard AC, *et al.* Detection of Highly Pathogenic Avian Influenza Virus H5N1 Clade  
440 2.3.4.4b in Great Skuas: A Species of Conservation Concern in Great Britain. *Viruses* **14**,  
441 (2022).
- 442  
443 26. Costa ES, *et al.* Antarctic and sub-Antarctic seabirds in South America: a review. *Oecologia*  
444 *Australis* **15**, 59-68 (2011).
- 445  
446 27. Meagan Dewar RETV, Thierry Boulonier, Craig Cary, Augustin Clessin, Amandine Gamble,  
447 Rachael Gray, Wray Grimaldi, Tom Hart, Virginia Morandini, Soledad Leonardi, Marcela



- 448 Uhart, Jane Younger, Michelle Wille. Biological Risk Assessment of Highly Pathogenic  
449 Avian Influenza in the Southern Ocean.). Scientific Committee on Antarctic Research (2023).
- 450
- 451 28. Baumeister E, *et al.* Serological evidences of influenza A virus infection in Antarctica  
452 migratory birds. In: *International Congress Series*. Elsevier (2004).
- 453
- 454 29. de Seixas MMM, *et al.* H6N8 avian influenza virus in Antarctic seabirds demonstrates  
455 connectivity between South America and Antarctica. *Transboundary and emerging diseases*  
456 **69**, e3436-e3446 (2022).
- 457
- 458 30. Hurt AC, *et al.* Evidence for the Introduction, Reassortment, and Persistence of Diverse  
459 Influenza A Viruses in Antarctica. *Journal of Virology* **90**, 9674-9682 (2016).
- 460
- 461 31. Zamora G, *et al.* Scavengers as Prospective Sentinels of Viral Diversity: the Snowy Sheathbill  
462 Virome as a Potential Tool for Monitoring Virus Circulation, Lessons from Two Antarctic  
463 Expeditions. *Microbiology spectrum* **11**, e03302-03322 (2023).
- 464
- 465 32. de Souza Petersen E, *et al.* First detection of avian influenza virus (H4N7) in Giant Petrel  
466 monitored by geolocators in the Antarctic region. *Marine Biology* **164**, 1-9 (2017).
- 467
- 468 33. Boulinier T. Avian influenza spread and seabird movements between colonies. *Trends in*  
469 *Ecology & Evolution*, (2023).
- 470
- 471 34. Gittins O, *et al.* Serological and molecular surveys of influenza A viruses in Antarctic and  
472 sub-Antarctic wild birds. *Antarctic Science* **32**, 15-20 (2020).
- 473
- 474 35. Wallensten A, *et al.* Mounting evidence for the presence of influenza A virus in the avifauna  
475 of the Antarctic region. *Antarctic Science* **18**, 353-356 (2006).
- 476
- 477 36. Morgan I, Westbury H. Virological studies of Adelie penguins (*Pygoscelis adeliae*) in  
478 Antarctica. *Avian Diseases*, 1019-1026 (1981).
- 479
- 480 37. Austin F, Webster R. Evidence of ortho-and paramyxoviruses in fauna from Antarctica.  
481 *Journal of Wildlife Diseases* **29**, 568-571 (1993).
- 482
- 483 38. Barriga G, *et al.* Avian Influenza Virus H5 Strain with North American and Eurasian Lineage  
484 Genes in an Antarctic Penguin. *Emerging Infectious Disease journal* **22**, 2221 (2016).
- 485
- 486 39. Ogrzewalska M, *et al.* Influenza A (H11N2) Virus Detection in Fecal Samples from Adélie  
487 (*Pygoscelis adeliae*) and Chinstrap (*Pygoscelis antarcticus*) Penguins, Penguin Island,  
488 Antarctica. *Microbiology spectrum* **10**, e01427-01422 (2022).
- 489
- 490 40. Hurt AC, *et al.* Detection of evolutionarily distinct avian influenza A viruses in Antarctica.  
491 *MBio* **5**, 10.1128/mbio. 01098-01014 (2014).
- 492

- 493 41. Dewar M, *et al.* The Risk of Avian Influenza in the Southern Ocean: A practical guide.  
494 (2022).
- 495  
496 42. Youk S, *et al.* H5N1 highly pathogenic avian influenza clade 2.3.4.4b in wild and domestic  
497 birds: Introductions into the United States and reassortments, December 2021–April 2022.  
498 *Virology* **587**, 109860 (2023).
- 499  
500 43. Wolfaardt A, Christie D. Guidelines for the implementation of the Agreement on the  
501 Conservation of Albatrosses and Petrels (ACAP) at South Georgia and the South Sandwich  
502 Islands. *Government of South Georgia and the South Sanwich Islands, Stanley, Falkland*  
503 *Islands*, (2010).
- 504  
505 44. Tancell C, Sutherland WJ, Phillips RA. Marine spatial planning for the conservation of  
506 albatrosses and large petrels breeding at South Georgia. *Biological Conservation* **198**, 165-  
507 176 (2016).
- 508  
509 45. Hogg OT, Barnes DK, Griffiths HJ. Highly diverse, poorly studied and uniquely threatened  
510 by climate change: an assessment of marine biodiversity on South Georgia's continental shelf.  
511 *PloS one* **6**, e19795 (2011).
- 512  
513 46. Clarke A, Croxall JP, Poncet S, Martin AR, Burton R. Important bird areas: South Georgia.  
514 *British Birds* **105**, 118-144 (2012).
- 515  
516 47. Wakefield ED, *et al.* Space Partitioning Without Territoriality in Gannets. *Science* **341**, 68-70  
517 (2013).
- 518  
519 48. Votier SC, Grecian WJ, Patrick S, Newton J. Inter-colony movements, at-sea behaviour and  
520 foraging in an immature seabird: results from GPS-PPT tracking, radio-tracking and stable  
521 isotope analysis. *Marine biology* **158**, 355-362 (2011).
- 522  
523 49. Jeglinski J, *et al.* HPAIV outbreak triggers long-distance movements in breeding Northern  
524 gannets--implications for disease spread. (2023).
- 525  
526 50. Croxall JP, Silk JR, Phillips RA, Afanasyev V, Briggs DR. Global circumnavigations:  
527 tracking year-round ranges of nonbreeding albatrosses. *Science* **307**, 249-250 (2005).
- 528  
529 51. Phillips RA, Silk JRD, Croxall JP, Afanasyev V. Year-round distribution of white-chinned  
530 petrels from South Georgia: Relationships with oceanography and fisheries. *Biological*  
531 *Conservation* **129**, 336-347 (2006).
- 532  
533 52. Techow N, *et al.* Speciation and phylogeography of giant petrels *Macronectes*. *Molecular*  
534 *Phylogenetics and Evolution* **54**, 472-487 (2010).
- 535  
536 53. Postel A, *et al.* Infections with highly pathogenic avian influenza A virus (HPAIV) H5N8 in  
537 harbor seals at the German North Sea coast, 2021. *Emerging Microbes & Infections* **11**, 725-  
538 729 (2022).

- 539  
540 54. Mirolo M, *et al.* Highly pathogenic avian influenza A virus (HPAIV) H5N1 infection in two  
541 European grey seals (*Halichoerus grypus*) with encephalitis. *Emerging Microbes & Infections*  
542 **12**, e2257810 (2023).
- 543  
544 55. Grémillet D, *et al.* Strong breeding colony fidelity in northern gannets following high  
545 pathogenicity avian influenza virus (HPAIV) outbreak. *Biological Conservation* **286**, 110269  
546 (2023).
- 547  
548 56. Underhill L, Petersen S, Cooper J. Nest densities of the wandering albatross *Diomedea*  
549 *exulans* at the Prince Edward Islands, estimated using GPS. *African Journal of Marine*  
550 *Science* **25**, 529-535 (2003).
- 551  
552 57. Jouventin P, Lequette B. The dance of the Wandering Albatross *Diomedea exulans*. *Emu-*  
553 *Austral Ornithology* **90**, 123-131 (1990).
- 554  
555 58. Abolnik C, *et al.* The Molecular Epidemiology of Clade 2.3.4.4B H5N1 High Pathogenicity  
556 Avian Influenza in Southern Africa, 2021-2022. *Viruses* **15**, (2023).
- 557  
558 59. Crawford R, Cooper J, Dyer B. Population of the macaroni penguin *Eudyptes chrysolophus* at  
559 Marion Island, 1994/95–2002/03, with information on breeding and diet. *African Journal of*  
560 *Marine Science* **25**, 475-486 (2003).
- 561  
562 60. Quintana R, Cirelli V. Breeding dynamics of a gentoo penguin *Pygoscelis papua* population at  
563 Cierva Point, Antarctic Peninsula. *Marine Ornithology* **28**, 29-35 (2000).
- 564  
565 61. James J, *et al.* Rapid and sensitive detection of high pathogenicity Eurasian clade 2.3.4.4b  
566 avian influenza viruses in wild birds and poultry. *Journal of Virological Methods* **301**, 114454  
567 (2022).
- 568  
569 62. Spackman E, *et al.* Development of a Real-Time Reverse Transcriptase PCR Assay for Type  
570 A Influenza Virus and the Avian H5 and H7 Hemagglutinin Subtypes. *Journal of Clinical*  
571 *Microbiology* **40**, 3256-3260 (2002).
- 572  
573 63. Payungporn S, *et al.* Single step multiplex real-time RT-PCR for H5N1 influenza A virus  
574 detection. *Journal of Virological Methods* **131**, 143-147 (2006).
- 575  
576 64. Sutton DA, *et al.* Development of an avian avulavirus 1 (AAvV-1) L-gene real-time RT-PCR  
577 assay using minor groove binding probes for application as a routine diagnostic tool. *Journal*  
578 *of Virological Methods* **265**, 9-14 (2019).
- 579  
580 65. World Organisation for Animal Health (WOAH). Terrestrial Manual: Avian influenza  
581 (infection with avian influenza viruses). (2019).
- 582  
583 66. Chrzastek K, *et al.* Use of Sequence-Independent, Single-Primer-Amplification (SISPA) for  
584 rapid detection, identification, and characterization of avian RNA viruses. *Virology* **509**, 159-  
585 166 (2017).

- 586  
587 67. Leyson C, *et al.* Pathogenicity and genomic changes of a 2016 European H5N8 highly  
588 pathogenic avian influenza virus (clade 2.3.4.4) in experimentally infected mallards and  
589 chickens. *Virology* **537**, 172-185 (2019).
- 590  
591 68. Markin A, Wagle S, Grover S, Vincent Baker AL, Eulenstein O, Anderson TK. PARNAS:  
592 Objectively Selecting the Most Representative Taxa on a Phylogeny. *Systematic Biology* **72**,  
593 1052-1063 (2023).
- 594  
595 69. Katoh K, Standley DM. MAFFT multiple sequence alignment software version 7:  
596 improvements in performance and usability. *Molecular biology and evolution* **30**, 772-780  
597 (2013).
- 598  
599 70. Larsson A. AliView: a fast and lightweight alignment viewer and editor for large datasets.  
600 *Bioinformatics* **30**, 3276-3278 (2014).
- 601  
602 71. Minh BQ, *et al.* IQ-TREE 2: New Models and Efficient Methods for Phylogenetic Inference  
603 in the Genomic Era. *Molecular biology and evolution* **37**, 1530-1534 (2020).
- 604  
605 72. Lean FZX, *et al.* Subclinical hepatitis E virus infection in laboratory ferrets in the UK. *The*  
606 *Journal of general virology* **103**, (2022).
- 607  
608 73. Sagulenko P, Puller V, Neher RA. TreeTime: Maximum-likelihood phylodynamic analysis.  
609 *Virus evolution* **4**, vex042 (2018).
- 610  
611

# Figure 1

## A

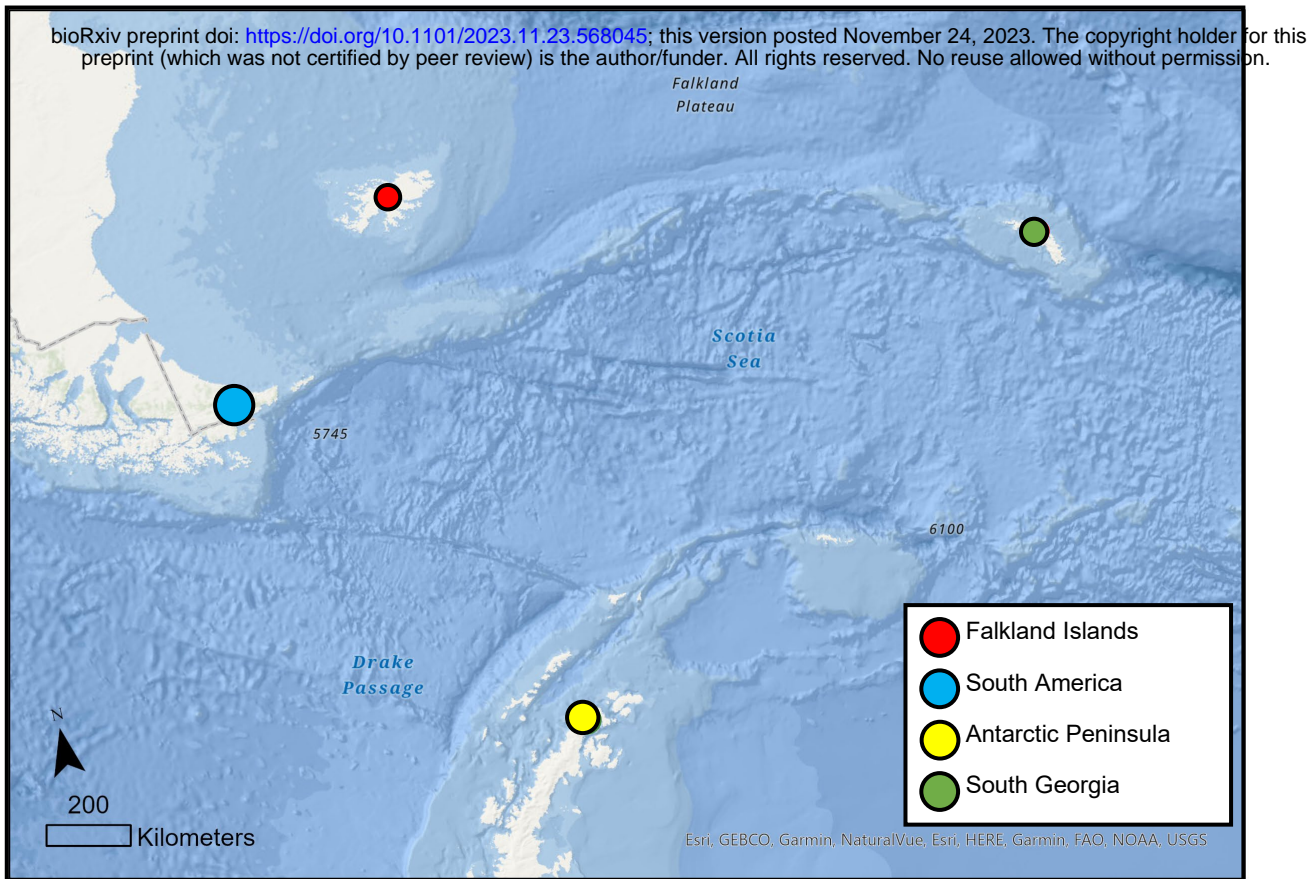

## B

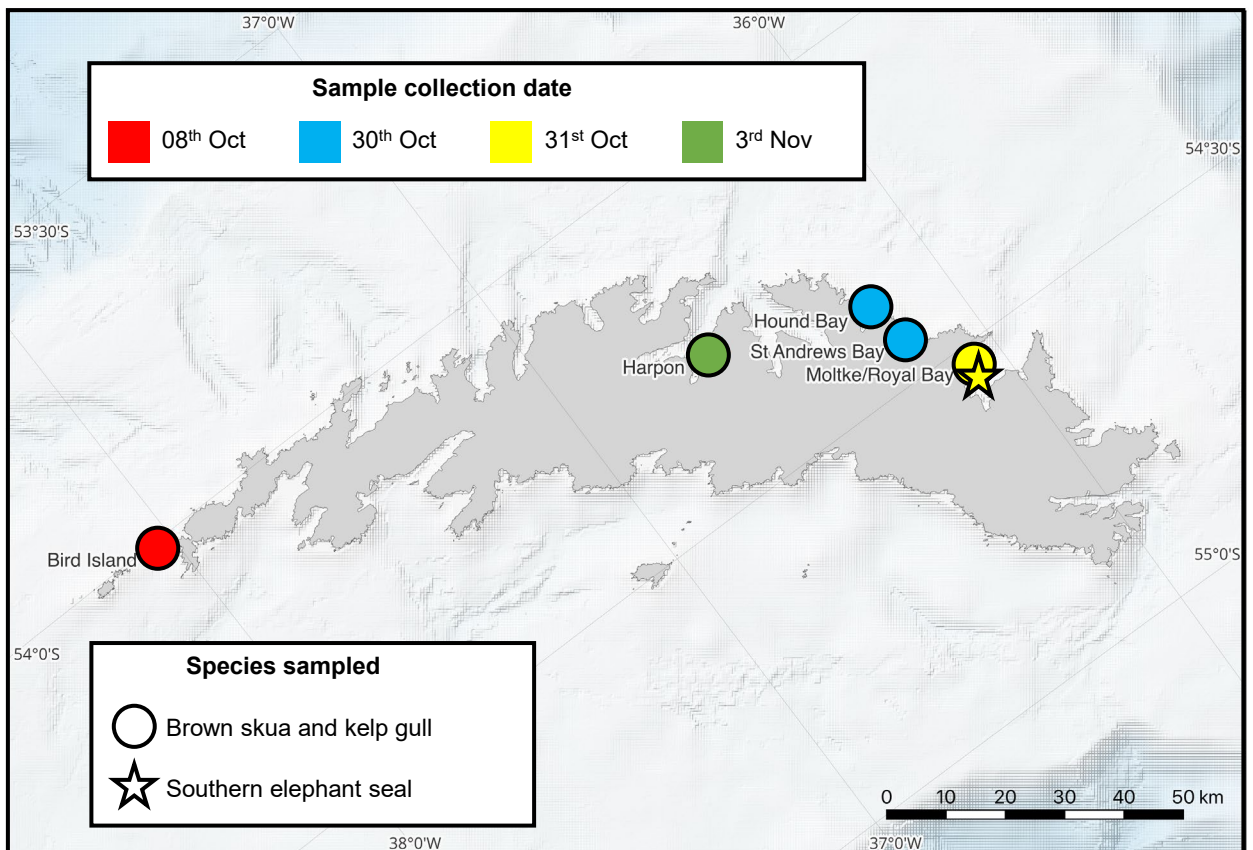

Figure 2

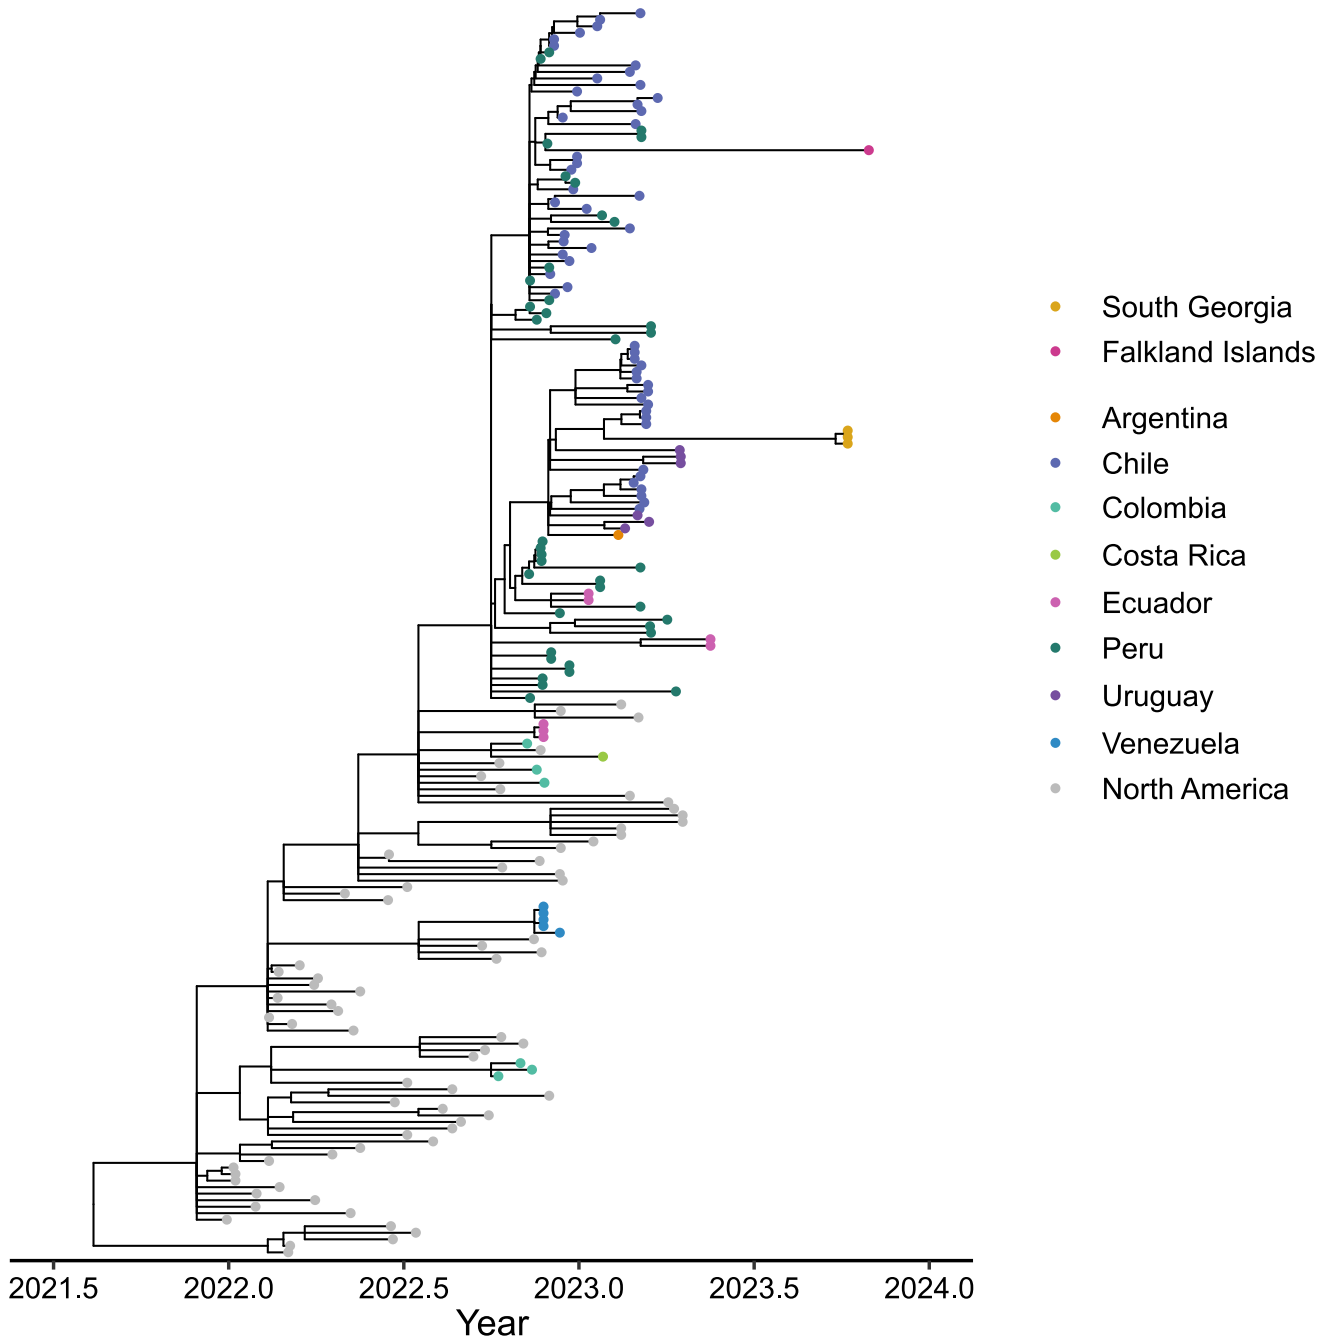

Source: https://www.biorxiv.org/content/10.1101/2023.11.23.568045v1.full.pdf
